# Supplementary material for: Sweet Potato (Ipomoea batatas L.) Phenotypes: From Agroindustry to Health Effects
Source: MDPI journal article supplement (doi:10.3390/foods11071058), 2022-04-06
Supplement: s1 [file s1]

Supplementary Material (Table S2) - Nutrient data for raw/processed sweet potatoes and other edible roots &amp; tubers

|                                 | Potatoes     | Cassava      | Yams         | Orange-fleshed sweet potato (OFSP) |              |                |               |                |                |                |                |
|---------------------------------|--------------|--------------|--------------|------------------------------------|--------------|----------------|---------------|----------------|----------------|----------------|----------------|
|                                 | Raw          | Raw          | Raw          | Raw                                | Leaves       | Canned         | Canned/mashed | Candy          | Chips          | Boiled         | Fries          |
| <i>NDB # / FDC Id.</i>          | <i>11352</i> | <i>11134</i> | <i>11601</i> | <i>11507</i>                       | <i>11505</i> | <i>1103254</i> | <i>11514</i>  | <i>1103252</i> | <i>1103258</i> | <i>1103247</i> | <i>1103257</i> |
| Water (g)                       | 79.3         | 59.7         | 69.6         | 77.0                               | 86.8         | 75.7           | 73.9          | 57.5           | 4.5            | 79.8           | 44.5           |
| Energy (Kcal)                   | 77           | 160          | 118          | 86                                 | 42           | 91             | 101           | 178            | 529            | 76             | 259            |
| Energy (KJ)                     | 322          | 667          | 494          | 359                                | 175          | 380            | 422           | 743            | 2207           | 317            | 1081           |
| Protein (g)                     | 2.1          | 1.4          | 1.5          | 1.6                                | 2.5          | 1.6            | 2.0           | 1.0            | 2.9            | 1.4            | 2.1            |
| Fat (g)                         | 0.1          | 0.3          | 0.2          | 0.1                                | 0.5          | 0.2            | 0.2           | 3.3            | 32.2           | 0.1            | 18.1           |
| Carbohydrates (by difference)   | 17.5         | 38.1         | 27.9         | 20.0                               | 8.8          | 21.0           | 23.2          | 37.5           | 56.5           | 17.7           | 34.1           |
| Sugars (g)                      | 0.8          | 1.7          | 0.5          | 4.2                                | 0.0          | 5.0            | 5.5           | 29.0           | 8.8            | 5.7            | 12.3           |
| Total dietary fiber (TDF, g)    | 2.1          | 1.8          | 4.1          | 3.0                                | 5.3          | 1.8            | 1.7           | 1.8            | 8.8            | 2.5            | 5.5            |
| Ca (mg)                         | 12.0         | 16.0         | 17.0         | 30.0                               | 78.0         | 22.0           | 30.0          | 20.0           | 59.0           | 27.0           | 50.0           |
| Fe (mg)                         | 0.8          | 0.3          | 0.5          | 0.6                                | 1.0          | 0.9            | 1.3           | 0.5            | 2.1            | 0.7            | 0.8            |
| Mg (mg)                         | 23.0         | 21.0         | 21.0         | 25.0                               | 70.0         | 22.0           | 24.0          | 13.0           | 65.0           | 18.0           | 25.0           |
| P (mg)                          | 57.0         | 27.0         | 55.0         | 47.0                               | 81.0         | 49.0           | 52.0          | 23.0           | 144.0          | 32.0           | 56.0           |
| K (mg)                          | 425.0        | 271.0        | 816.0        | 337.0                              | 508.0        | 311.0          | 210.0         | 165.0          | 920.0          | 229.0          | 391.0          |
| Na (mg)                         | 6.0          | 14.0         | 9.0          | 55.0                               | 6.0          | 207.0          | 75.0          | 142.0          | 227.0          | 181.0          | 140.0          |
| Zn (mg)                         | 0.30         | 0.34         | 0.24         | 0.30                               | 0.90         | 0.18           | 0.21          | 0.15           | 0.53           | 0.20           | 0.36           |
| Cu (mg)                         | 0.11         | 0.10         | 0.18         | 0.15                               |              | 0.14           | 0.28          | 0.07           | 0.41           | 0.09           | 0.17           |
| Se (µg)                         | 0.40         | 0.70         | 0.70         | 0.60                               | 0.90         | 0.70           | 0.80          | 0.30           | 2.10           | 0.20           | 0.40           |
| Ascorbate (C, mg)               | 19.70        | 20.60        | 17.10        | 2.40                               | 11.00        | 26.30          | 5.20          | 9.10           | 0.00           | 12.70          | 6.80           |
| Tiamin (B1, mg)                 | 0.08         | 0.09         | 0.11         | 0.08                               | 0.16         | 0.04           | 0.03          | 0.04           | 0.09           | 0.06           | 0.08           |
| Riboflavin (B2, mg)             | 0.03         | 0.05         | 0.03         | 0.06                               | 0.35         | 0.06           | 0.09          | 0.04           | 0.16           | 0.05           | 0.09           |
| Niacin (B3, mg)                 | 1.06         | 0.85         | 0.55         | 0.56                               | 1.13         | 0.74           | 0.96          | 0.38           | 2.10           | 0.54           |                |
| Piridoxine (B6, mg)             | 0.30         | 0.09         | 0.29         | 0.21                               | 0.19         | 0.19           | 0.24          | 0.14           | 0.53           | 0.16           | 0.17           |
| Folic acid (B9, µg)             | 15.00        | 27.00        | 23.00        | 11.00                              | 1.00         | 17.00          | 11.00         | 4.00           | 37.00          | 6.00           | 29.00          |
| Choline (mg)                    | 12.10        | 23.70        | 16.50        | 12.30                              |              | 12.90          |               | 8.00           | 36.00          | 10.80          | 24.90          |
| A (IU)                          | 2.00         | 13.0         | 138.0        | 14187.0                            | 3778.0       | 7951.7         | 8698.3        | 11221.7        | 23556.7        | 1576.7         | 8300.0         |
| A (RAE, µg)                     | 0.00         | 1.0          | 7.0          | 709.0                              |              | 397.0          | 435.0         | 574.0          | 1178.0         | 784.0          | 45.0           |
| β-carotene (µg)                 | 1.00         | 8.0          | 83.0         | 8509.0                             | 2217.0       | 4771.0         | 5219.0        | 6733.0         | 14134.0        | 9406.0         | 4980.0         |
| α-carotene (µg)                 | 0.0          | 0.0          | 0.0          | 7.0                                | 42.0         | 0.0            | 0.0           | 0.0            | 0.0            | 0.0            | 0.0            |
| β-criptoxanthin (µg)            | 0.0          | 0.0          | 0.0          | 0.0                                | 58.0         | 0.0            | 0.0           | 0.0            | 0.0            | 0.0            | 0.0            |
| α-tocopherol (E, mg)            | 0.01         | 0.19         | 0.35         | 0.26                               |              | 1.00           | 1.10          | 1.03           | 9.77           | 0.94           | 0.00           |
| Phylloquinone (K, µg)           | 2.00         | 1.90         | 2.30         | 1.80                               | 302.20       | 0.00           | 2.40          | 4.40           | 24.40          | 2.10           | 15.70          |
| Saturated fatty acids (g)       | 0.025        | 0.074        | 0.037        | 0.018                              | 0.110        | 0.041          | 0.040         | 0.906          | 2.930          | 0.030          | 2.420          |
| 16:0 (g)                        | 0.016        | 0.069        | 0.034        | 0.018                              | 0.100        | 0.040          | 0.040         | 0.477          | 1.390          | 0.030          | 1.710          |
| 18:0 (g)                        | 0.004        | 0.005        | 0.004        | 0.000                              | 0.000        | 0.000          | 0.000         | 0.200          | 0.000          | 0.000          | 0.000          |
| Monounsaturated fatty acids (g) | 0.002        | 0.075        | 0.006        | 0.001                              | 0.020        | 0.008          | 0.008         | 1.143          | 9.100          | 0.000          | 7.550          |
| 18:1 (g)                        | 0.001        | 0.075        | 0.006        | 0.001                              | 0.020        | 0.008          | 0.008         | 1.116          | 8.800          | 0.000          | 7.380          |
| Polyunsaturated fatty acids (g) | 0.042        | 0.048        | 0.076        | 0.014                              | 0.228        | 0.084          | 0.080         | 0.994          | 12.160         | 0.060          | 6.680          |
| 18:2 (g)                        | 0.032        | 0.032        | 0.064        | 0.013                              | 0.192        | 0.071          | 0.070         | 0.882          | 11.020         | 0.060          | 5.874          |
| 18:3 (g)                        | 0.010        | 0.017        | 0.012        | 0.000                              | 0.000        | 0.013          | 0.000         | 0.112          | 1.140          | 0.000          | 0.796          |

USDA Nutrient Data Bank: <https://fdc.nal.usda.gov/>; Storage root or tuber (R/T)
