# Supplementary material for: Sweet Potato (Ipomoea batatas L.) Phenotypes: From Agroindustry to Health Effects
Source: MDPI journal article supplement (doi:10.3390/foods11071058), 2022-04-06
Supplement: s1 [file s1]

Supplementary Material (Table S1) - Agricultural outlook 1999-2019: Sweet Potatoes (Complete FAOSTAT Data)

| Country                               | 1999      |             |               | 2009      |            |               | 2019      |            |               |
|---------------------------------------|-----------|-------------|---------------|-----------|------------|---------------|-----------|------------|---------------|
|                                       | A (Ha)    | P (Tons)    | Yield (Hg/Ha) | A (Ha)    | P (Tons)   | Yield (Hg/Ha) | A (Ha)    | P (Tons)   | Yield (Hg/Ha) |
| Réunion                               | 15        | 300         | 200,000       | --        | --         | --            | --        | --         | --            |
| Martinique                            | 120       | 1,170       | 97,500        | --        | --         | --            | --        | --         | --            |
| Guadeloupe                            | 390       | 4,267       | 109,410       | --        | --         | --            | --        | --         | --            |
| Greece                                | 339       | 6,250       | 184,366       | 173       | 3,522      | 203,584       | --        | --         | --            |
| Italy                                 | 1,275     | 10,231      | 80,243        | 439       | 7,771      | 177,016       | --        | --         | --            |
| Spain                                 | 1,267     | 20,364      | 160,726       | 1,443     | 24,838     | 172,128       | --        | --         | --            |
| Portugal                              | 2,668     | 23,687      | 88,782        | 1,758     | 23,490     | 133,618       | --        | --         | --            |
| Bhutan                                | --        | --          | --            | 104       | 105        | 10,096        | 25        | 48         | 19,200        |
| Botswana                              | --        | --          | --            | --        | --         | --            | 300       | 3,000      | 100,000       |
| Malawi                                | --        | --          | --            | --        | --         | --            | 368,927   | 5,908,989  | 160,167       |
| Niue                                  | 14        | 247         | 176,429       | 15        | 251        | 167,333       | 16        | 251        | 156,875       |
| Suriname                              | 16        | 196         | 122,500       | 7         | 98         | 140,000       | 66        | 888        | 134,545       |
| Belize                                | 25        | 107         | 42,800        | 4         | 32         | 80,000        | 18        | 86         | 47,778        |
| Antigua and Barbuda                   | 26        | 153         | 58,846        | 43        | 269        | 62,558        | 44        | 289        | 65,582        |
| Maldives                              | 29        | 48          | 16,552        | 15        | 12         | 8,000         | 2         | 2          | 10,000        |
| Guatemala                             | 30        | 200         | 66,667        | 10        | 65         | 65,000        | 17        | 109        | 64,118        |
| Yemen                                 | 33        | 318         | 96,364        | 45        | 407        | 90,444        | 42        | 352        | 83,810        |
| Brunei Darussalam                     | 35        | 180         | 51,429        | 41        | 252        | 61,463        | 36        | 284        | 78,889        |
| Trinidad and Tobago                   | 35        | 222         | 63,429        | 138       | 271        | 19,638        | 314       | 967        | 30,796        |
| Mauritius                             | 35        | 400         | 114,286       | 77        | 950        | 123,377       | 40        | 414        | 103,500       |
| Cook Islands                          | 46        | 1,212       | 263,478       | 18        | 480        | 266,667       | 6         | 175        | 291,667       |
| Costa Rica                            | 50        | 150         | 30,000        | 85        | 250        | 29,412        | 201       | 601        | 29,900        |
| Saint Kitts and Nevis                 | 50        | 170         | 34,000        | 26        | 230        | 88,462        | 40        | 306        | 76,500        |
| Saint Lucia                           | 50        | 480         | 96,000        | 42        | 397        | 94,524        | 23        | 530        | 230,435       |
| Bahamas                               | 68        | 259         | 38,088        | 386       | 1,332      | 34,508        | 592       | 2,080      | 35,135        |
| Grenada                               | 72        | 200         | 27,778        | 46        | 128        | 27,826        | 2,821     | 7,886      | 27,955        |
| El Salvador                           | 83        | 525         | 63,253        | 104       | 636        | 61,154        | 132       | 760        | 57,576        |
| Honduras                              | 120       | 763         | 63,583        | 1,090     | 7,000      | 64,220        | 2,843     | 16,984     | 59,740        |
| New Caledonia                         | 167       | 490         | 29,341        | 595       | 689        | 11,580        | 626       | 626        | 10,000        |
| Palestine                             | 167       | 5,037       | 301,617       | 95        | 2,500      | 263,158       | 67        | 1,832      | 273,433       |
| Barbados                              | 220       | 3,500       | 159,091       | 41        | 888        | 216,585       | 91        | 2,093      | 230,000       |
| Tonga                                 | 249       | 3,080       | 123,695       | 572       | 6,352      | 111,049       | 651       | 6,483      | 99,585        |
| Puerto Rico                           | 320       | 2,526       | 78,938        | 298       | 2,633      | 88,356        | 58        | 492        | 84,828        |
| Ecuador                               | 337       | 1,913       | 56,766        | 1,900     | 3,600      | 18,947        | 2,240     | 3,922      | 17,509        |
| Dominica                              | 436       | 1,787       | 40,986        | 410       | 2,086      | 50,878        | 380       | 2,385      | 62,763        |
| Fiji                                  | 477       | 5,224       | 109,518       | 357       | 4,894      | 137,087       | 901       | 9,053      | 100,477       |
| Micronesia (Federated States of)      | 530       | 3,075       | 58,019        | 543       | 3,094      | 56,980        | 561       | 3,108      | 55,401        |
| Somalia                               | 540       | 5,400       | 100,000       | 772       | 7,608      | 98,549        | 868       | 8,626      | 99,378        |
| Morocco                               | 545       | 7,290       | 133,761       | 695       | 11,882     | 170,964       | 457       | 9,366      | 204,945       |
| Cabo Verde                            | 720       | 3,800       | 52,778        | 450       | 7,700      | 171,111       | 195       | 3,395      | 174,103       |
| Australia                             | 800       | 22,000      | 275,000       | 1,693     | 42,460     | 250,797       | 2,168     | 78,910     | 363,976       |
| Pakistan                              | 825       | 9,268       | 112,339       | 1,046     | 11,951     | 114,254       | 1,688     | 15,963     | 94,568        |
| Israel                                | 894       | 8,600       | 96,197        | 3,444     | 32,237     | 93,603        | 2,417     | 35,032     | 144,940       |
| New Zealand                           | 1,000     | 17,000      | 170,000       | 1,036     | 12,400     | 119,691       | 1,202     | 12,050     | 100,250       |
| Chile                                 | 1,077     | 7,382       | 68,542        | 1,303     | 11,303     | 86,746        | 1,410     | 18,436     | 130,752       |
| Eswatini                              | 1,264     | 2,300       | 18,196        | 1,358     | 2,500      | 18,409        | 1,285     | 2,458      | 19,128        |
| Congo                                 | 1,350     | 9,000       | 66,667        | 976       | 6,853      | 70,215        | 1,306     | 9,395      | 71,937        |
| Guyana                                | 1,354     | 2,990       | 22,083        | 93        | 2,310      | 248,387       | 511       | 14,151     | 276,928       |
| Saint Vincent and the Grenadines      | 1,363     | 2,181       | 16,001        | 2,300     | 2,800      | 12,174        | 253       | 2,500      | 98,814        |
| Venezuela (Bolivarian Republic of)    | 1,530     | 13,928      | 91,033        | 750       | 8,000      | 106,667       | 1,665     | 17,336     | 104,120       |
| Jamaica                               | 1,543     | 24,970      | 161,828       | 2,004     | 34,229     | 170,803       | 2,456     | 43,188     | 175,847       |
| Gabon                                 | 1,600     | 2,800       | 17,500        | 1,665     | 3,124      | 18,763        | 2,119     | 4,227      | 19,948        |
| Liberia                               | 1,800     | 18,000      | 100,000       | 2,016     | 20,895     | 103,646       | 2,136     | 24,455     | 114,490       |
| Togo                                  | 2,036     | 9,206       | 45,634        | 597       | 3,989      | 66,817        | 2,375     | 8,672      | 36,514        |
| Burkina Faso                          | 2,058     | 17,294      | 84,033        | 6,419     | 81,499     | 126,965       | 5,907     | 66,383     | 112,380       |
| Mauritania                            | 2,077     | 2,066       | 9,947         | 2,301     | 2,573      | 11,182        | 2,826     | 5,081      | 17,979        |
| Zimbabwe                              | 2,202     | 4,813       | 21,857        | 9,235     | 23,285     | 25,214        | 12,512    | 35,400     | 28,293        |
| Comoros                               | 2,284     | 5,141       | 22,509        | 2,807     | 6,503      | 23,167        | 3,394     | 8,001      | 23,574        |
| Malaysia                              | 2,300     | 25,000      | 108,696       | 1,309     | 13,495     | 103,094       | 3,317     | 56,323     | 169,801       |
| Niger                                 | 2,400     | 49,500      | 206,250       | 3,042     | 48,742     | 160,230       | 6,233     | 173,171    | 277,829       |
| Mexico                                | 2,458     | 47,465      | 193,104       | 2,313     | 44,052     | 190,454       | 3,104     | 59,358     | 191,231       |
| Senegal                               | 3,034     | 26,538      | 87,469        | 1,500     | 60,000     | 400,000       | 2,316     | 89,397     | 385,997       |
| Bolivia (Plurinational State of)      | 3,100     | 13,600      | 43,871        | 1,616     | 7,551      | 46,726        | 1,070     | 4,487      | 41,935        |
| Timor-Leste                           | 3,500     | 14,000      | 40,000        | 4,807     | 12,790     | 26,607        | 1,375     | 2,862      | 20,815        |
| Mali                                  | 4,407     | 46,779      | 106,147       | 12,381    | 236,759    | 191,228       | 19,807    | 312,477    | 157,761       |
| Solomon Islands                       | 5,200     | 74,000      | 142,308       | 6,700     | 96,000     | 143,284       | 7,614     | 107,894    | 141,705       |
| Sudan (former)                        | 5,400     | 116,000     | 214,815       | 9,660     | 216,000    | 223,602       | 25,130    | 253,628    | 100,926       |
| Myanmar                               | 5,414     | 30,585      | 56,492        | 7,200     | 59,000     | 81,944        | 6,537     | 62,631     | 95,810        |
| Uruguay                               | 6,000     | 60,000      | 100,000       | 7,600     | 72,000     | 94,737        | 8,805     | 80,444     | 91,362        |
| Sierra Leone                          | 7,547     | 34,200      | 45,316        | 38,724    | 176,969    | 45,700        | 18,675    | 178,753    | 95,718        |
| Sri Lanka                             | 8,380     | 51,600      | 61,575        | 6,000     | 47,270     | 78,783        | 3,255     | 35,607     | 109,392       |
| Dominican Republic                    | 8,558     | 52,952      | 61,874        | 6,086     | 47,147     | 77,468        | 6,914     | 54,714     | 79,135        |
| Cambodia                              | 9,322     | 32,516      | 34,881        | 9,283     | 78,891     | 84,984        | 8,063     | 42,473     | 52,676        |
| Paraguay                              | 10,085    | 79,365      | 78,696        | 5,126     | 44,511     | 86,936        | 5,087     | 50,520     | 99,312        |
| Egypt                                 | 10,520    | 253,053     | 240,545       | 12,517    | 357,266    | 285,425       | 14,165    | 454,041    | 320,537       |
| Benin                                 | 10,885    | 68,847      | 63,249        | 11,471    | 63,695     | 55,527        | 10,279    | 68,323     | 66,469        |
| Equatorial Guinea                     | 11,735    | 36,000      | 30,677        | 17,582    | 81,244     | 46,209        | 19,829    | 124,115    | 62,593        |
| Lao People's Democratic Republic      | 13,050    | 80,600      | 61,762        | 18,131    | 171,147    | 94,395        | 5,720     | 114,885    | 200,848       |
| Peru                                  | 14,552    | 244,671     | 168,136       | 16,006    | 262,724    | 164,141       | 16,764    | 301,344    | 179,757       |
| South Africa                          | 14,774    | 52,000      | 35,197        | 21,000    | 63,022     | 30,010        | 32,112    | 88,692     | 27,620        |
| Argentina                             | 17,000    | 244,784     | 143,991       | 21,596    | 327,132    | 151,478       | 22,671    | 337,487    | 148,863       |
| Republic of Korea                     | 20,109    | 428,085     | 212,882       | 20,918    | 350,661    | 167,636       | 21,775    | 309,211    | 142,003       |
| Angola                                | 22,000    | 182,303     | 82,865        | 147,813   | 982,588    | 66,475        | 178,272   | 1,680,146  | 94,246        |
| Côte d'Ivoire                         | 23,639    | 50,824      | 21,500        | 24,434    | 45,580     | 18,654        | 28,981    | 52,212     | 18,023        |
| Chad                                  | 24,000    | 62,000      | 25,833        | 4,982     | 28,856     | 57,921        | 32,635    | 217,324    | 66,592        |
| Ethiopia                              | 24,702    | 220,000     | 89,062        | 53,431    | 450,697    | 84,351        | 52,406    | 1,755,855  | 335,048       |
| Cameroon                              | 27,054    | 178,272     | 65,895        | 49,012    | 266,078    | 54,288        | 85,953    | 495,177    | 57,610        |
| United States of America              | 33,590    | 554,335     | 165,030       | 39,214    | 883,100    | 225,200       | 59,370    | 1,450,250  | 244,273       |
| Democratic People's Republic of Korea | 36,500    | 490,000     | 134,247       | 29,000    | 390,000    | 134,483       | 41,148    | 561,796    | 136,531       |
| Zambia                                | 37,000    | 52,000      | 14,054        | 60,638    | 200,450    | 33,057        | 27,341    | 109,336    | 39,990        |
| Bangladesh                            | 41,278    | 383,000     | 92,786        | 31,697    | 305,025    | 96,232        | 23,014    | 235,881    | 102,495       |
| Guinea                                | 42,695    | 162,760     | 38,122        | 25,000    | 82,194     | 32,878        | 55,014    | 281,700    | 51,205        |
| Brazil                                | 43,158    | 472,422     | 109,463       | 42,241    | 477,472    | 113,035       | 57,290    | 805,412    | 140,585       |
| Japan                                 | 44,500    | 1,008,000   | 226,517       | 40,500    | 1,026,000  | 253,333       | 34,300    | 748,700    | 218,280       |
| Democratic Republic of the Congo      | 49,092    | 246,000     | 50,110        | 48,585    | 243,460    | 50,110        | 108,211   | 542,686    | 50,151        |
| Kenya                                 | 51,320    | 543,089     | 105,824       | 77,821    | 1,034,204  | 132,895       | 65,973    | 893,656    | 135,458       |
| Cuba                                  | 53,075    | 261,000     | 49,176        | 78,496    | 437,100    | 55,684        | 54,176    | 555,078    | 102,458       |
| Mozambique                            | 55,000    | 400,000     | 72,727        | 86,300    | 900,000    | 104,287       | 33,970    | 451,204    | 132,824       |
| Haiti                                 | 58,000    | 172,000     | 29,655        | 75,000    | 294,172    | 39,223        | 9,333     | 42,002     | 45,004        |
| Ghana                                 | 65,000    | 90,000      | 13,846        | 72,249    | 117,879    | 16,316        | 73,621    | 154,260    | 20,953        |
| Madagascar                            | 92,000    | 520,000     | 56,522        | 127,000   | 910,857    | 71,721        | 132,579   | 1,113,142  | 83,961        |
| Papua New Guinea                      | 102,000   | 480,000     | 47,059        | 120,000   | 595,000    | 49,583        | 145,077   | 743,735    | 51,265        |
| Burundi                               | 112,000   | 734,172     | 65,551        | 138,000   | 926,119    | 67,125        | 93,578    | 1,023,458  | 109,370       |
| Philippines                           | 132,349   | 557,386     | 42,115        | 114,300   | 560,516    | 49,005        | 83,338    | 525,862    | 63,100        |
| India                                 | 134,400   | 1,152,400   | 85,744        | 124,300   | 1,119,700  | 90,080        | 110,000   | 1,156,000  | 105,091       |
| Indonesia                             | 172,243   | 1,665,547   | 96,698        | 183,874   | 2,057,913  | 111,920       | 86,360    | 1,806,339  | 209,164       |
| Rwanda                                | 179,941   | 862,562     | 47,936        | 123,386   | 803,228    | 65,099        | 183,889   | 1,247,584  | 67,844        |
| Viet Nam                              | 270,200   | 1,744,600   | 64,567        | 146,600   | 1,211,300  | 82,626        | 116,698   | 1,402,350  | 120,169       |
| United Republic of Tanzania           | 282,020   | 565,220     | 20,042        | 651,940   | 1,417,390  | 21,741        | 539,513   | 3,921,590  | 72,688        |
| Uganda                                | 539,000   | 2,354,000   | 43,673        | 463,000   | 1,943,000  | 41,965        | 463,568   | 1,949,476  | 42,054        |
| Nigeria                               | 817,000   | 2,451,000   | 30,000        | 1,100,000 | 3,300,000  | 30,000        | 1,717,659 | 4,145,488  | 24,135        |
| China                                 | 5,945,975 | 126,143,701 | 212,150       | 3,253,056 | 70,040,593 | 215,307       | 2,373,737 | 51,992,156 | 219,031       |
| Country                               | 1999      |             |               | 2009      |            |               | 2019      |            |               |
|                                       | A (Ha)    | P (Tons)    | Yield (Hg/Ha) | A (Ha)    | P (Tons)   | Yield (Hg/Ha) | A (Ha)    | P (Tons)   | Yield (Hg/Ha) |
| World                                 | 9,743,043 |             |               |           |            |               |           |            |               |
